# Supplementary material for: A novel nanocomposite of mesoporous silica supported Ni nanocrystals modified by ceria clusters with extremely high light-to-fuel efficiency for UV-vis-IR light-driven CO2 reduction
Source: Royal Society of Chemistry journal article supplement (doi:10.1039/c9ta00259f), 2019-01-01
Supplement: c9ta00259f1.pdf [file c9ta00259f1.pdf]

## Supporting Information

### A novel nanocomposite of mesoporous silica supported Ni nanocrystals modified by ceria clusters with extremely high light-to-fuel efficiency for UV-Vis-IR light-driven CO<sub>2</sub> reduction

Zhongkai Jiang, Yuanzhi Li,\* Qian Zhang, Yi Yang, Shaowen Wu, Jichun Wu, Xiujuan Zhao

State Key Laboratory of Silicate Materials for Architectures (Wuhan University of Technology), 122  
Luoshi Road, Wuhan 430070, P. R. China. Email: liyuanzhi66@hotmail.com

**Table S1.** Comparison of catalytic activity and light-to-fuel efficiency of different CO<sub>2</sub> reduction strategies.

| Methods                                                                   | Catalyst                                            | Light intensity (kWm <sup>-2</sup> ) | CO production rate                                        |                                                                   | Light-to-fuel efficiency (%) | Reference                                        |
|---------------------------------------------------------------------------|-----------------------------------------------------|--------------------------------------|-----------------------------------------------------------|-------------------------------------------------------------------|------------------------------|--------------------------------------------------|
|                                                                           |                                                     |                                      | Reported                                                  | Calculated (mmol min <sup>-1</sup> g <sup>-1</sup> ) <sup>a</sup> |                              |                                                  |
| Solar thermochemical CO <sub>2</sub> dissociation                         | porous monolithic CeO <sub>2</sub>                  | 1500                                 | 1500 mL min <sup>-1</sup>                                 | 0.206                                                             | 0.8                          | [1] <i>Science</i> , 2010, 330, 1797             |
| Solar thermochemical CO <sub>2</sub> dissociation                         | Reticulated porous ceramic foam of CeO <sub>2</sub> | 3000                                 | 1.2 mL·min <sup>-1</sup> g <sup>-1</sup>                  | 0.054                                                             | 5.25                         | [2] <i>Energy Environ. Sci.</i> , 2017, 10, 1142 |
| Photocatalytic CO <sub>2</sub> reduction by H <sub>2</sub> O              | Hierarchical treated rape pollen                    | 2.5                                  | 845.7 μmol h <sup>-1</sup> g <sup>-1</sup>                | 0.014                                                             | 6.7 <sup>e</sup>             | [4] <i>Energy Environ. Sci.</i> , 2018, 11, 2382 |
| Photocatalytic CO <sub>2</sub> reduction by H <sub>2</sub> O              | hierarchical NC@NiCo <sub>2</sub> O <sub>4</sub>    | no data provided                     | 2.62×10 <sup>4</sup> μmol h <sup>-1</sup> g <sup>-1</sup> | 0.44                                                              | 1.07 <sup>e</sup>            | [11] <i>Energy Environ. Sci.</i> , 2018, 11, 306 |
| Photoelectrochemical CO <sub>2</sub> reduction by H <sub>2</sub> O        | Copper iron oxide electrode                         | 1                                    | 5 μmol h <sup>-1</sup>                                    | 3.33×10 <sup>-4</sup> <sup>b</sup>                                | 1                            | [22] <i>Energy Environ. Sci.</i> , 2015, 8, 2638 |
| Photothermocatalytic CO <sub>2</sub> reduction by H <sub>2</sub>          | Ru/Si nanowires                                     | 3.2                                  | 0.80 mmol g <sup>-1</sup> h <sup>-1</sup>                 | 0.0133 <sup>c</sup>                                               | no data <sup>f</sup>         | [25] <i>Adv. Sci.</i> , 2014, 1, 1400001         |
| Light-driven thermocatalytic CO <sub>2</sub> reduction by CH <sub>4</sub> | Silica cluster modified Ni nanocrystals             | 343.6                                |                                                           | 19.9, 17.1 <sup>d</sup>                                           | 12.5                         | [31a] <i>Adv. Energy Mater.</i> , 2018, 1702472. |
| Light-driven thermocatalytic CO <sub>2</sub> reduction by CH <sub>4</sub> | Ceria cluster modified Ni nanocrystals              | 385.2                                |                                                           | 41.53, 33.42 <sup>d</sup>                                         | 27.4                         | In this work                                     |

*Note:* <sup>a</sup> The values are calculated according to the reported data, <sup>b</sup> formate production rate (mmol min<sup>-1</sup> cm<sup>-2</sup>), <sup>c</sup> CH<sub>4</sub> production rate, <sup>d</sup> H<sub>2</sub> production rate, <sup>e</sup> quantum efficiency at 420 nm (no light-to-fuel efficiency was provided), <sup>f</sup> Light-to-fuel conversion could not be realized by the strategy due to the exothermic characteristics of CO<sub>2</sub> reduction by H<sub>2</sub> (e. g. CO<sub>2</sub>+4H<sub>2</sub>=CH<sub>4</sub>+2H<sub>2</sub>O, ΔG<sub>298</sub>= -113.3 kJ mol<sup>-1</sup>).

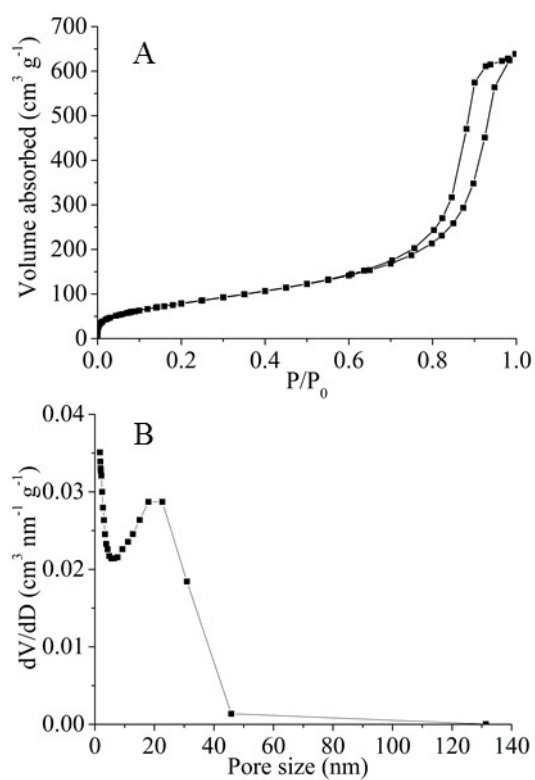

**Figure S1.** N<sub>2</sub> adsorption and desorption (A) and BJH adsorption pore size distribution (B) of Ni-CeO<sub>2</sub>/SiO<sub>2</sub>.

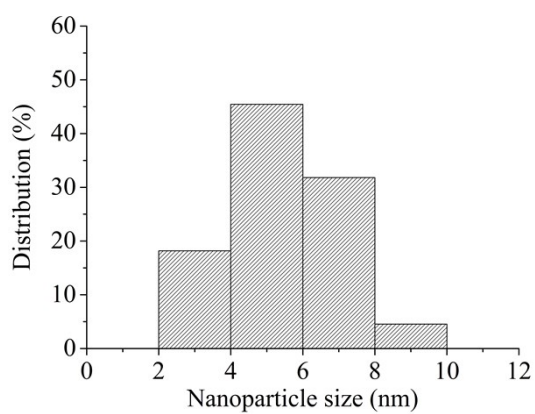

**Figure S2.** Size distribution of Ni nanoparticles in Ni-CeO<sub>2</sub>/SiO<sub>2</sub> by TEM.

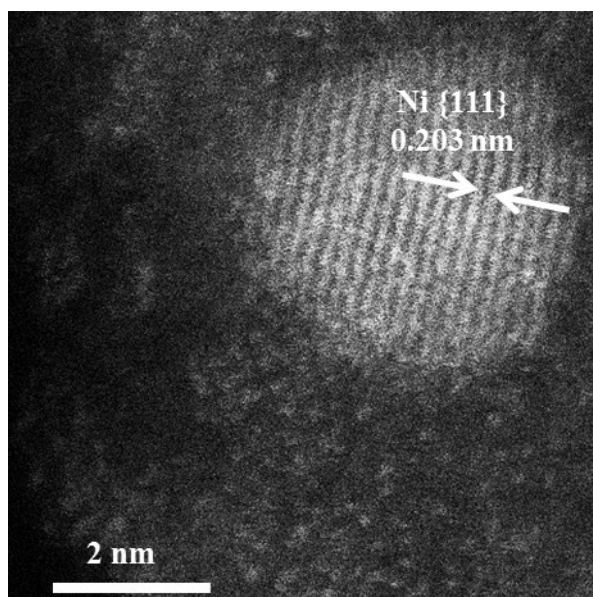

**Figure S3.** High resolution HAADF image of Ni-CeO<sub>2</sub>/SiO<sub>2</sub>. As shown in Ni mapping (Figure 1D), Ni in Ni-CeO<sub>2</sub>/SiO<sub>2</sub> exists in the form of Ni nanoparticles without randomly distributed Ni species. Therefore, randomly distributed bright dots (the lower part of the image) are Ce atoms in ceria clusters on silica. Similar bright dots are orderly distributed on a Ni nanocrystal. The orderly distributed bright dots are ascribed to Ce atoms in ceria clusters rather than Ni atoms in Ni nanocrystal. The reason is follows: As shown in the element mappings of Ni and Ce (Figure 1C and 1D), Ce atoms are well distributed on Ni nanocrystals. In HAADF image, the bright dots of Ce atoms have higher brightness than the dots of Ni atom due to the atomic number of Ce (58) much larger than that of Ni (28) according to the principle of HAADF.

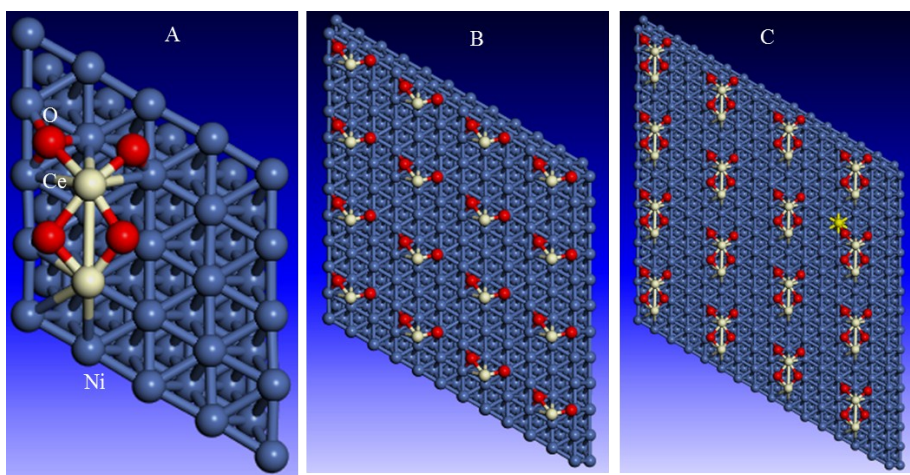

**Figure S4.** Geometry of the (CeO<sub>2</sub>)<sub>2</sub>/Ni<sub>48</sub> slab (A), and periodic configurations of the CeO<sub>2</sub>/Ni<sub>48</sub> slab (B), and the (CeO<sub>2</sub>)<sub>2</sub>/Ni<sub>48</sub> slab (C).

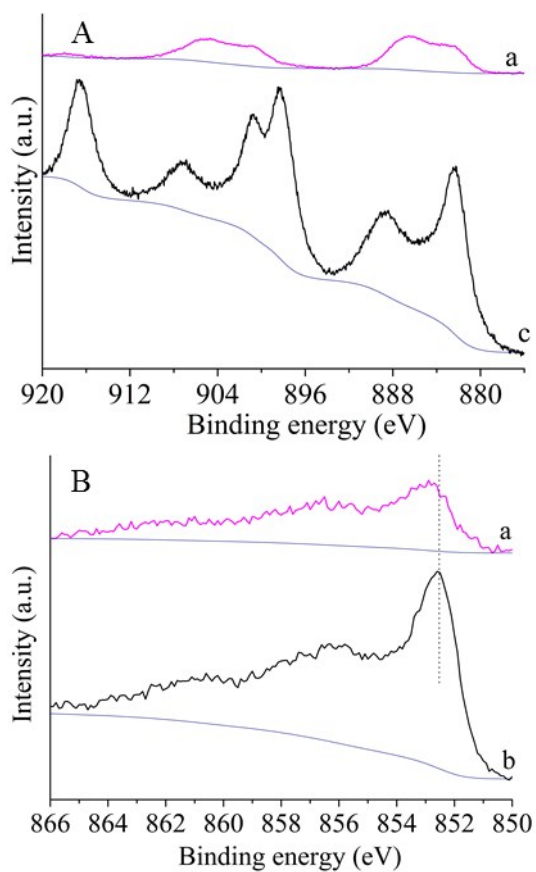

**Figure S5.** Ce 3d (A) and Ni 2p<sub>3/2</sub> (B) spectra of Ni-CeO<sub>2</sub>/SiO<sub>2</sub> (a), Ni/SiO<sub>2</sub> (b), and CeO<sub>2</sub> (c).

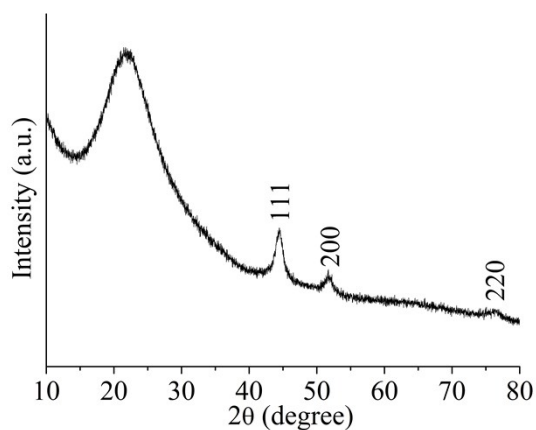

**Figure S6.** XRD patterns of Ni/SiO<sub>2</sub>. Ni/SiO<sub>2</sub> shows XRD peaks of crystalline metallic Ni (JCPDS 65-2865). SiO<sub>2</sub> exists in amorphous silica evidenced by a broad peak in the range of 15~30°. The average size of Ni nanocrystals in the nanocomposite, calculated in accordance to the Scherrer formula ( $L=0.89\lambda/\beta\cos\theta$ ) at the peak of {111} facets ( $2\theta = 44.5^\circ$ ), is 7.3 nm.

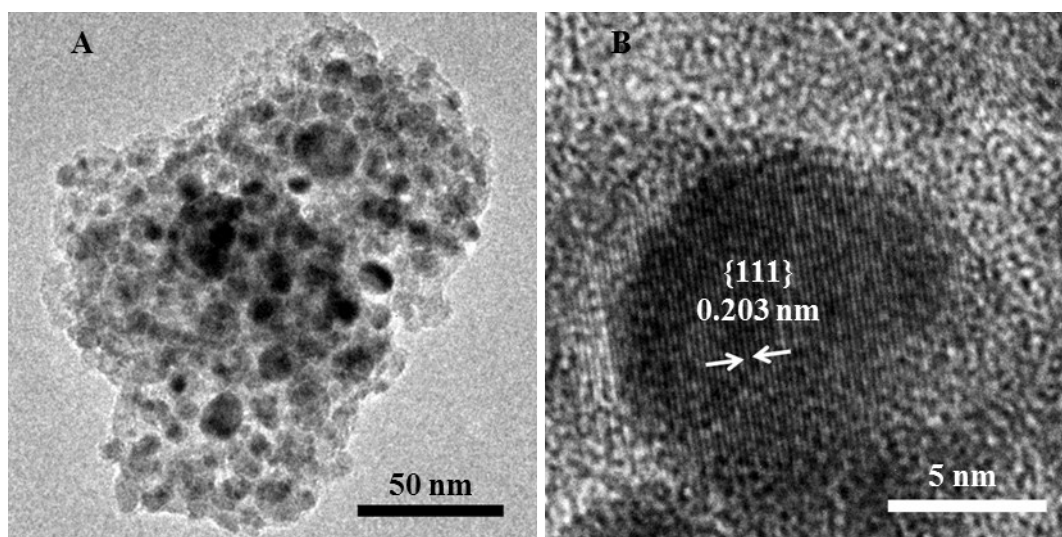

**Figure S7.** TEM image (A) and HRTEM image (B) of Ni/SiO<sub>2</sub>. HRTEM image demonstrates that Ni nanocrystal surrounded by amorphous silica has clear lattice spacing of {111} facets (0.203 nm).

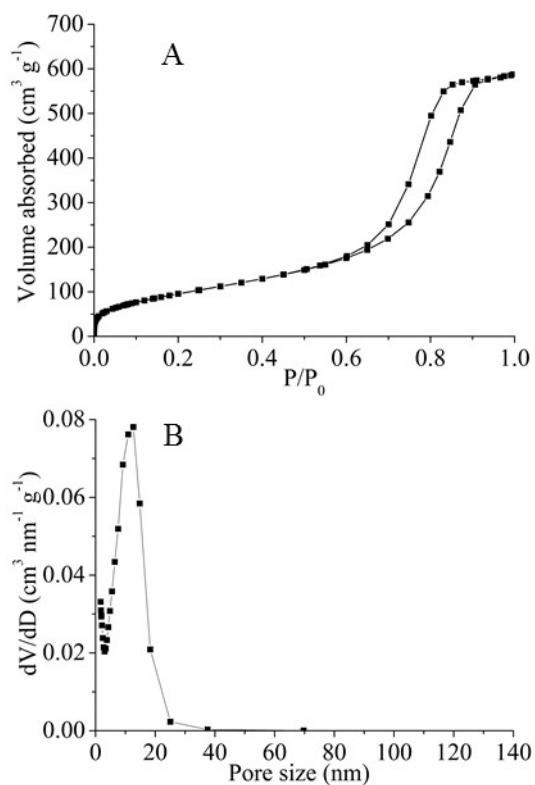

**Figure S8.** N<sub>2</sub> adsorption and desorption (A) and BJH adsorption pore size distribution (B) of Ni/SiO<sub>2</sub>.

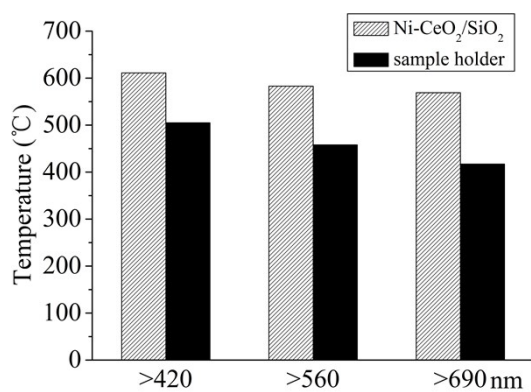

**Figure S9.** The  $T_{eq}$  values of Ni-CeO<sub>2</sub>/SiO<sub>2</sub> and the sample holder surface (without catalyst) under the focused visible-infrared illumination.

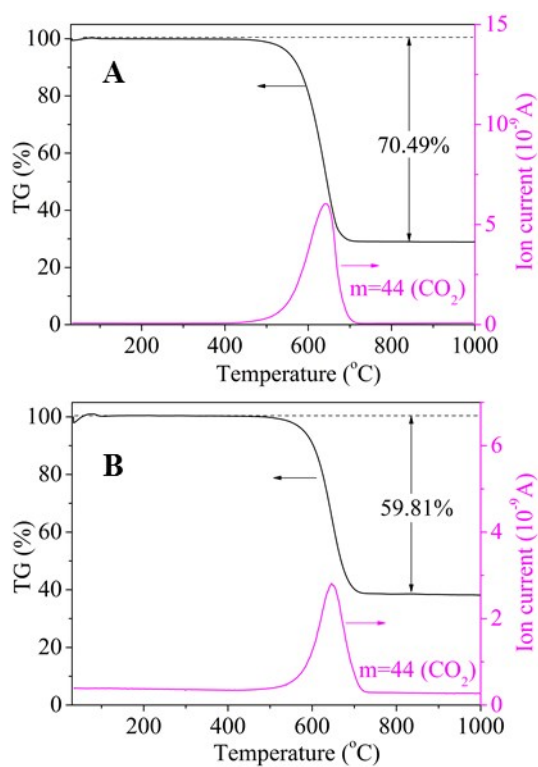

**Figure S10.** TG-MS profiles of the used Ni-CeO<sub>2</sub>/SiO<sub>2</sub> catalyst after 100 h CRM reaction under focused UV-visible-infrared illumination (A) and the used Ni/SiO<sub>2</sub> catalyst after 4 h CRM reaction under focused UV-visible-infrared illumination (B).

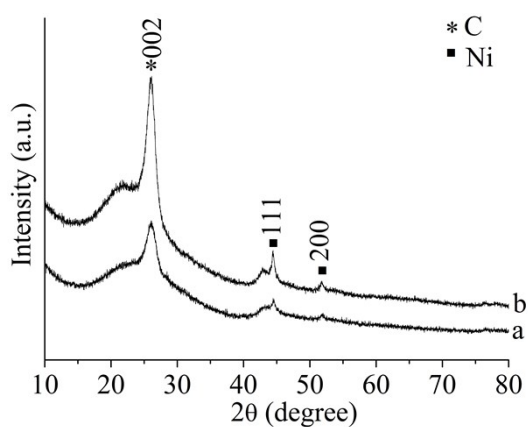

**Figure S11.** XRD patterns of the used Ni-CeO<sub>2</sub>/SiO<sub>2</sub> catalyst after 100 h CRM reaction under focused UV-visible-infrared illumination (a) and the used Ni/SiO<sub>2</sub> catalyst after 4 h CRM reaction under focused UV-visible-infrared illumination (b): \* represents graphite 2H (PDF 75-1621).

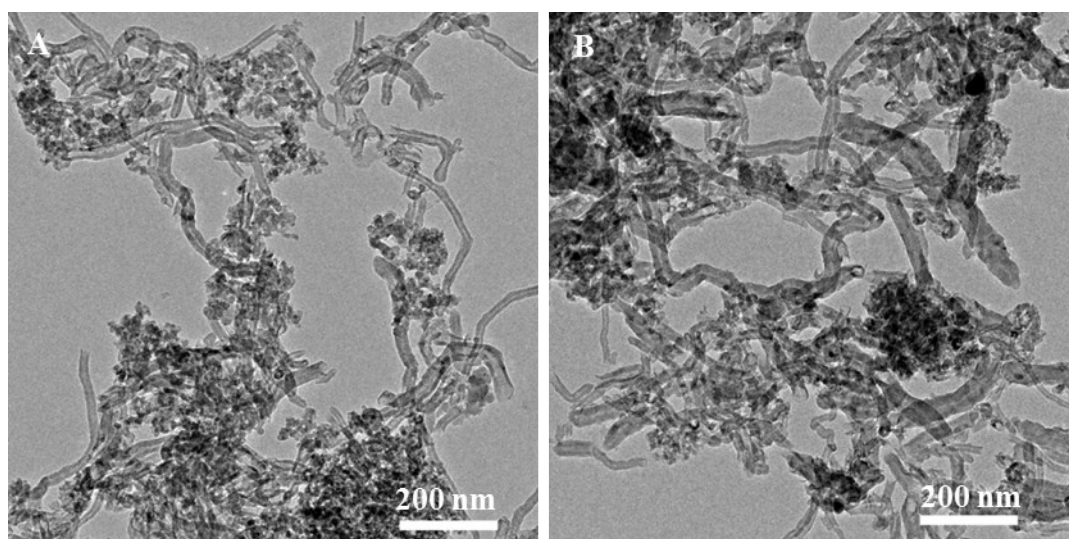

**Figure S12.** TEM images of the used Ni-CeO<sub>2</sub>/SiO<sub>2</sub> catalyst after 100 h CRM reaction under focused UV-visible-infrared illumination (A) and the used Ni/SiO<sub>2</sub> catalyst after 4 h CRM reaction under focused UV-visible-infrared illumination (B).



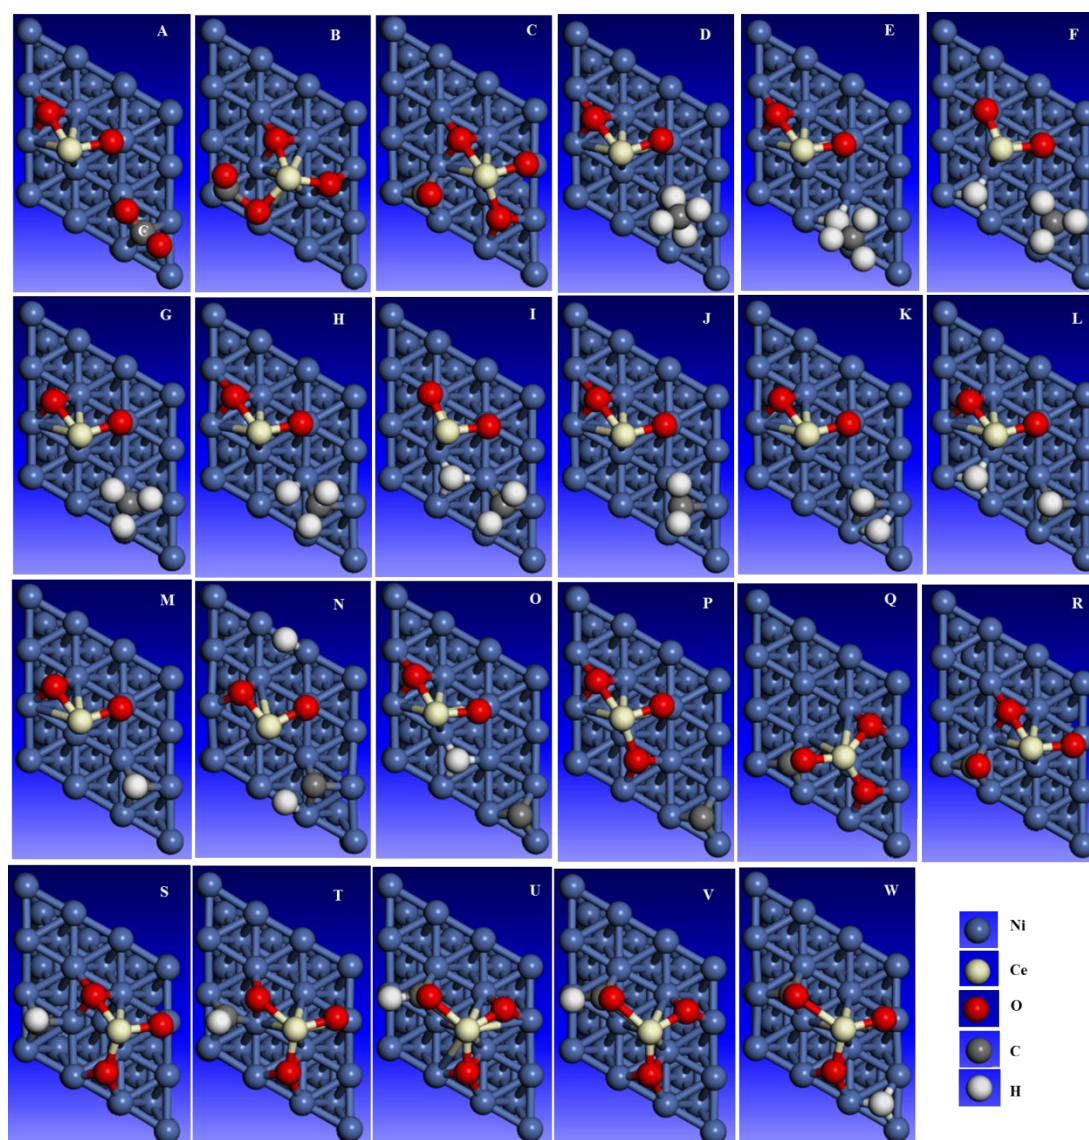

**Figure S13.** Geometries of the initial states, transition states, and intermediates for CRM on the  $\text{CeO}_2/\text{Ni}_{36}$  slab in the ground states: chemisorbed  $\text{CO}_2$  (A), transition state of  $\text{CO}_2$  dissociation (B), intermediate of  $\text{CO}_2$  dissociation (C), chemisorbed  $\text{CH}_4$  (D), transition state of  $\text{CH}_4$  dissociation (E), intermediate of  $\text{CH}_4$  dissociation (F), chemisorbed  $\text{CH}_3$  (G), transition state of  $\text{CH}_3$  dissociation (H), intermediate of  $\text{CH}_3$  dissociation (I), chemisorbed  $\text{CH}_2$  (J), transition state for  $\text{CH}_2$  dissociation (K), intermediate of  $\text{CH}_2$  dissociation (L), chemisorbed  $\text{CH}$  (M), transition state  $\text{CH}$  dissociation (N), intermediate of  $\text{CH}$  dissociation (O), chemisorbed intermediate of C and O (P), transition state of C oxidation (Q), chemisorbed CO (R), chemisorbed intermediate of CH and O (S), transition state of CH oxidation (T), intermediate of CHO by CH oxidation (U), transition state of CHO dissociation (V), and intermediate of CO and H by CHO dissociation (W).

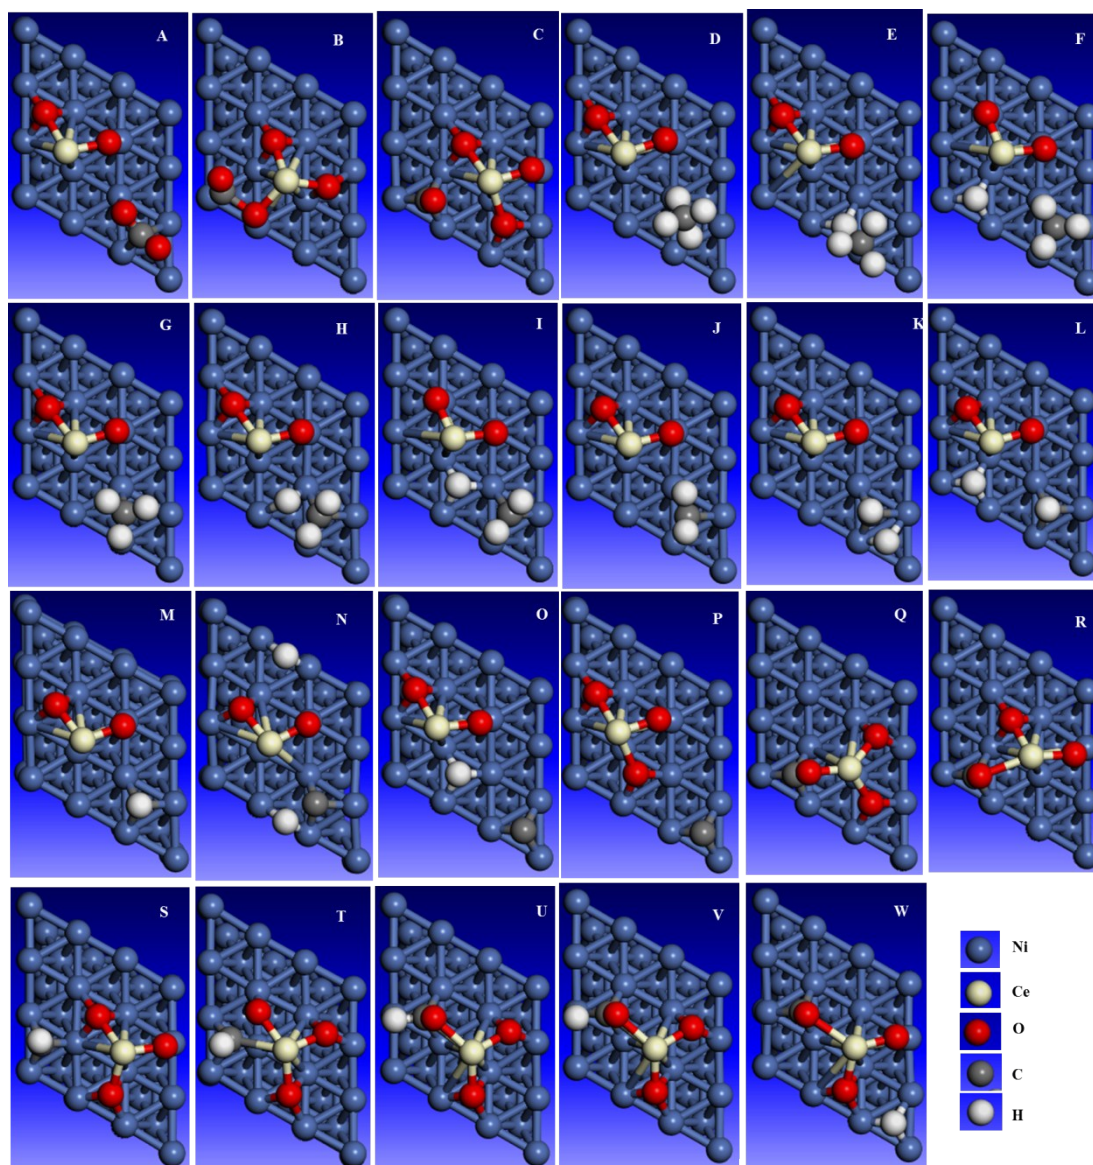

**Figure S14.** Geometries of the initial states, transition states, and intermediates for CRM on the  $\text{CeO}_2/\text{Ni}_{36}$  slab in the excited states: chemisorbed  $\text{CO}_2$  (A), transition state of  $\text{CO}_2$  dissociation (B), intermediate of  $\text{CO}_2$  dissociation (C), chemisorbed  $\text{CH}_4$  (D), transition state of  $\text{CH}_4$  dissociation (E), intermediate of  $\text{CH}_4$  dissociation (F), chemisorbed  $\text{CH}_3$  (G), transition state of  $\text{CH}_3$  dissociation (H), intermediate of  $\text{CH}_3$  dissociation (I), chemisorbed  $\text{CH}_2$  (J), transition state for  $\text{CH}_2$  dissociation (K), intermediate of  $\text{CH}_2$  dissociation (L), chemisorbed  $\text{CH}$  (M), transition state  $\text{CH}$  dissociation (N), intermediate of  $\text{CH}$  dissociation (O), chemisorbed intermediate of C and O (P), transition state of C oxidation (Q), chemisorbed CO (R), chemisorbed intermediate of CH and O (S), transition state of CH oxidation (T), intermediate of CHO by CH oxidation (U), transition state of CHO dissociation (V), and intermediate of CO and H by CHO dissociation (W).

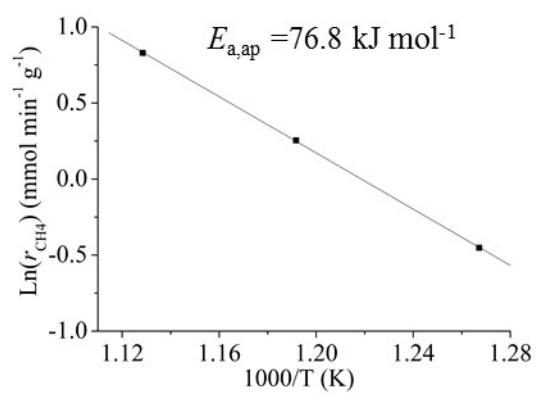

**Figure S15.**  $\text{Ln}(r_{\text{CH}_4})$  vs  $1/T$  (B) for CRM on the nanocomposite of Ni nanocrystals closely contacted by  $\text{CeO}_2$  nanocrystals ( $\text{Ni/CeO}_2$ , in Ref. 31b) under the focused UV-visible-infrared illumination.
